# Supplementary material for: A Deep Learning Approach to Accurately Discriminate Between Optic Disc Drusen and Papilledema on Fundus Photographs
Source: bioRxiv or medRxiv preprint supplement (doi:10.1101/2023.05.24.23290447), 2023-05-29
Supplement: Supplementary file [file media-1.pdf]

## Figures

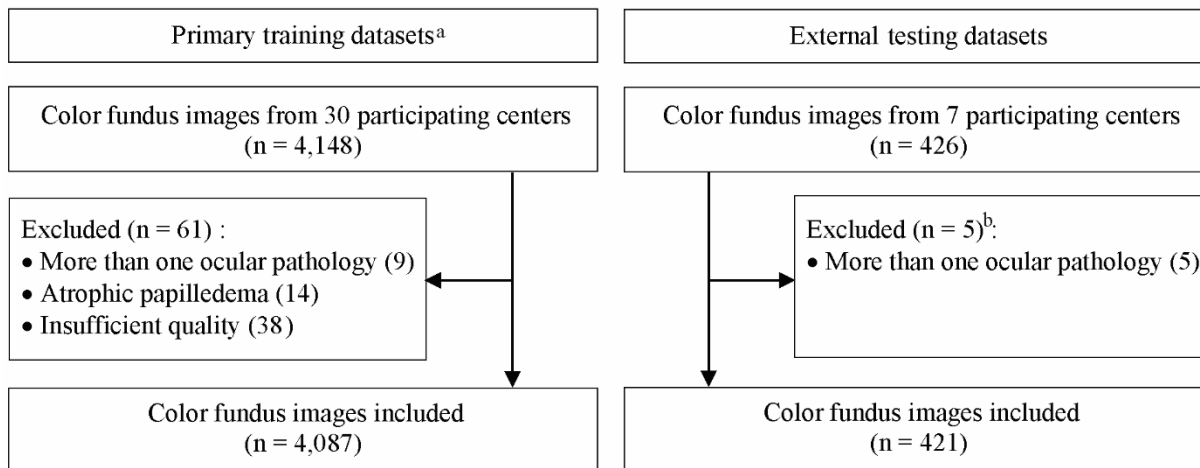

**Fig 1. Flowchart displaying the process of inclusion of fundus photographs in the training and testing datasets.**

<sup>a</sup> Primary training datasets included training, validation, and internal-testing datasets.

<sup>b</sup> Details are provided only for the optic disc drusen, the details regarding papilledema photographs are provided elsewhere.<sup>21</sup>

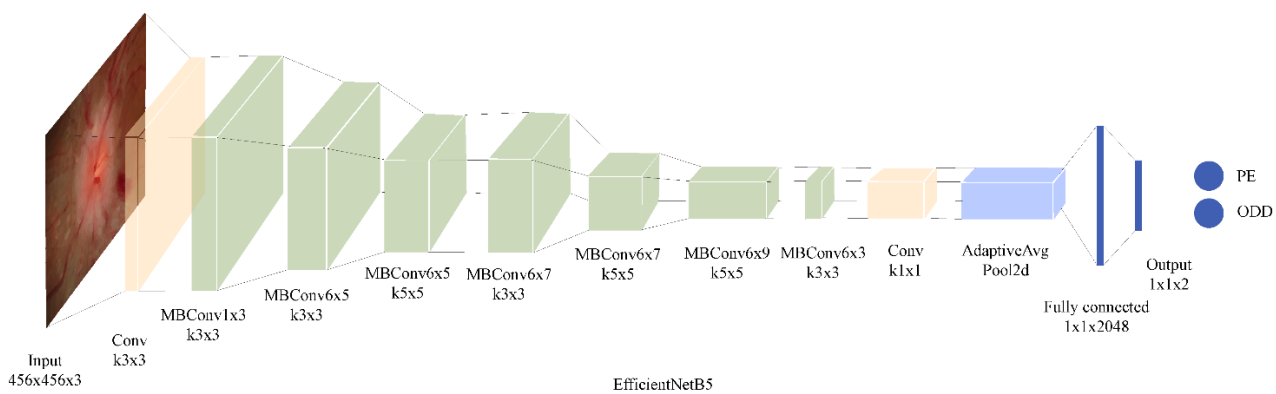

**Fig 2. Deep learning classification network.**

Abbreviation: AdaptiveAvg Pool2d = 2D adaptive average pooling; Conv = convolution; MBCConv = mobile inverted bottleneck convolution; ODD = optic disc drusen; PE = papilledema.

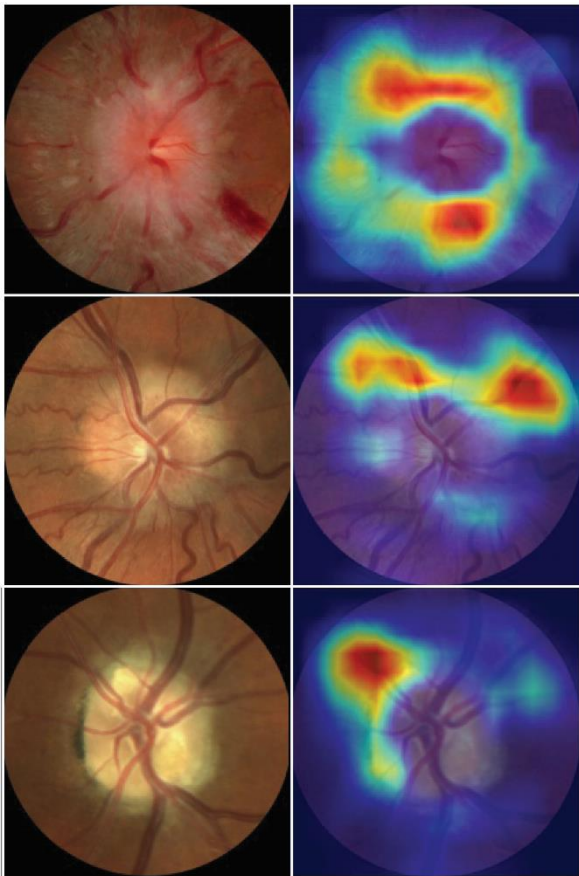

**Fig 3. Examples of color fundus photographs centered on the optic disc and corresponding class activation maps (heatmaps).**

Upper row: Optic disc photograph, accurately predicted as “papilledema” by the algorithm. The heatmap displays a circular, ring-shaped activation, at the margins of the optic disc. Middle row: optic disc photograph of confirmed buried optic disc drusen, accurately diagnosed by the algorithm (probability of ODD = 96.74% vs. probability of papilledema = 3.26%). Bottom row: photograph of an optic disc with visible optic disc drusen which was accurately identified by the algorithm (probability = 99.99%). The activation region (right column) displays a region that is superimposed on the visible drusen (left column, 11 o’clock).

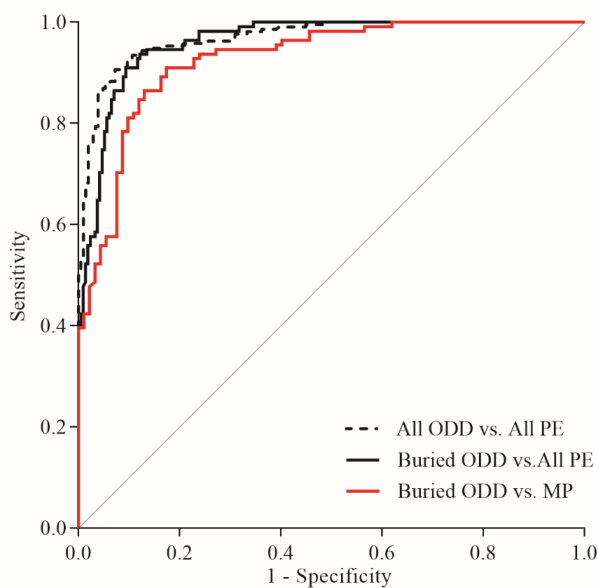

**Fig 4. Performance of the deep learning system for discriminating between buried optic disc drusen (ODD) and papilledema.**

The deep learning system discriminated ODD (both visible and buried) from papilledema (at all stages of severity), with an area under the receiver operating characteristic curve (AUC) of 0.97 (95% CI, 0.96 to 0.98). The system could discriminate between buried ODD and papilledema (at all stages of severity) with an AUC of 0.96 (95% CI, 0.95 to 0.98) and between buried ODD from discs with mild-to-moderate papilledema (AUC 0.93 [95% CI, 0.90 to 0.96]).

**Table 1** List of Participating Centers and Number of Images Included per Center

| Participating center                                             | Discs with ODD | Discs with PE | Total       |
|------------------------------------------------------------------|----------------|---------------|-------------|
|                                                                  | No. of images  |               |             |
| <b>Training, validation, and internal testing datasets</b>       |                |               |             |
| Angers, France                                                   | 34             | 307           | 341         |
| Atlanta, GA, United States                                       | 316            | 1231          | 1547        |
| Baltimore, MD, United States                                     | 37             | 134           | 171         |
| Bangkok, Thailand                                                | 3              | 0             | 3           |
| Bologna, Italy                                                   | 11             | 13            | 24          |
| Bordeaux, France                                                 | 21             | 45            | 66          |
| Chennai, India                                                   | 53             | 293           | 346         |
| Calgary, Alberta, Canada                                         | 0              | 100           | 100         |
| Coimbra, Portugal                                                | 18             | 24            | 42          |
| Copenhagen, Denmark                                              | 23             | 92            | 115         |
| Freiburg, Germany                                                | 88             | 61            | 149         |
| Geneva, Switzerland                                              | 4              | 14            | 18          |
| Grenoble, France                                                 | 8              | 6             | 14          |
| Guangzhou, China                                                 | 2              | 0             | 2           |
| Hongkong, China                                                  | 8              | 16            | 24          |
| Kinshasa, Democratic Republic of Congo                           | 0              | 8             | 8           |
| London, Ontario, Canada                                          | 0              | 276           | 276         |
| London, United Kingdom                                           | 20             | 34            | 54          |
| Manila, Philippines                                              | 2              | 11            | 13          |
| Paris, France                                                    | 2              | 101           | 103         |
| Rochester, MN, United States                                     | 21             | 96            | 117         |
| Seoul, Korea                                                     | 107            | 129           | 236         |
| Singapore, Singapore                                             | 2              | 72            | 74          |
| Sydney, Australia                                                | 24             | 50            | 74          |
| Syracuse, NY, United States                                      | 16             | 22            | 38          |
| Tehran, Iran                                                     | 25             | 5             | 30          |
| Toronto, Ontario, Canada                                         | 8              | 86            | 94          |
| Ufa, Russia                                                      | 4              | 4             | 8           |
| <b>Total Training, validation, and internal testing datasets</b> | <b>857</b>     | <b>3230</b>   | <b>4087</b> |
| <b>External-testing datasets</b>                                 |                |               |             |
| Angers, France                                                   | 0              | 10            | 10          |
| Bangkok, Thailand                                                | 0              | 36            | 36          |
| Calgary, Alberta, Canada                                         | 24             | 0             | 24          |
| Copenhagen, Denmark                                              | 101            | 0             | 101         |
| Freiburg, Germany                                                | 0              | 86            | 86          |
| London, Ontario, Canada                                          | 82             | 0             | 82          |
| Tehran, Iran                                                     | 0              | 82            | 82          |
| <b>Total external-testing data sets</b>                          | <b>207</b>     | <b>214</b>    | <b>421</b>  |

Abbreviations: ODD = optic disc drusen; PE = papilledema.

**Table 2** Demographics and Image Characteristics in the Training, Validation and Testing Datasets

| <b>Characteristics</b>                            | <b>Training and validation</b> | <b>Internal testing</b>  | <b>External testing</b>  | <b>Total</b> |
|---------------------------------------------------|--------------------------------|--------------------------|--------------------------|--------------|
| <b>Number of patients (images)</b>                | 1606 (3357)                    | 353 (730)                | 221 (421)                | 2180 (4508)  |
| <b>Age, y, mean (SD)</b>                          | 33.0 (15.3) <sup>a</sup>       | 30.3 (14.7) <sup>b</sup> | 33.8 (16.9) <sup>c</sup> | 33.0 (15.4)  |
| <b>Female, n (%)</b>                              | 1189 (77.8) <sup>a</sup>       | 263 (78.3) <sup>b</sup>  | 158 (71.5) <sup>c</sup>  | 1610 (77.2)  |
| <b>Images with buried ODD, n (%)<sup>d</sup></b>  | 403 (56.5)                     | 97 (67.4)                | 111 (53.6)               |              |
| <b>Images with visible ODD, n (%)<sup>d</sup></b> | 310 (43.5)                     | 47 (32.6)                | 96 (46.4)                |              |

<sup>a</sup> On the basis of 95.2% available patient demographic data.

<sup>b</sup> On the basis of 95.2% available patient demographic data.

<sup>c</sup> On the basis of 100.0% available patient demographic data.

<sup>d</sup> Percent referred to the total number of all ODD images in each column.

**Table 3** The Frequency Distribution of Buried Optic Disc Drusen Stratified by Age Groups

| Age groups | Training and Validation <sup>a</sup> |                       | Internal testing <sup>b</sup> |                       | External testing <sup>c</sup> |                       |
|------------|--------------------------------------|-----------------------|-------------------------------|-----------------------|-------------------------------|-----------------------|
|            | No. of all ODD images                | No. of buried ODD (%) | No. of all ODD images         | No. of buried ODD (%) | No. of all ODD images         | No. of buried ODD (%) |
| <11        | 65                                   | 63 (96.9)             | 20                            | 20 (100.0)            | 6                             | 5 (83.3)              |
| 11-20      | 184                                  | 139 (75.5)            | 37                            | 33 (89.2)             | 51                            | 36 (70.6)             |
| 21-30      | 90                                   | 55 (61.1)             | 25                            | 16 (64.0)             | 45                            | 25 (55.6)             |
| 31-40      | 80                                   | 44 (55.0)             | 19                            | 10 (52.6)             | 35                            | 14 (40.0)             |
| >40        | 261                                  | 87 (33.3)             | 32                            | 9 (28.1)              | 70                            | 31 (44.3)             |
| Total      | 680                                  | 388 (57.1)            | 133                           | 88 (66.2)             | 207                           | 111 (53.6)            |

<sup>a</sup> On the basis of 95.4% available age data

<sup>b</sup> On the basis of 92.4% available age data

<sup>c</sup> On the basis of 100.0% available age data

**Table 4** Classification Performance of the Deep-Learning System in Discriminating Optic Disc Drusen from Papilledema in the Validation, Internal-Testing Data Set and External-Testing Data Set

|                                 | <b>Total</b>  | <b>ODD</b> | <b>PE</b> | <b>AUC</b>       | <b>Sensitivity, %</b> | <b>Specificity, %</b> | <b>Accuracy, %</b> |
|---------------------------------|---------------|------------|-----------|------------------|-----------------------|-----------------------|--------------------|
|                                 | No. of images |            |           |                  | (95% CI)              |                       |                    |
| <b>Validation dataset</b>       |               |            |           |                  |                       |                       |                    |
| <b>ODD vs. PE</b>               | 501           | 105        | 396       | 0.99 (0.98-1.00) | 93.3 (89.5-97.1)      | 97.2 (95.8-98.8)      | 96.4 (95.0-97.8)   |
| <b>Internal-testing dataset</b> |               |            |           |                  |                       |                       |                    |
| <b>ODD vs. PE</b>               | 730           | 144        | 586       | 0.98 (0.97-0.99) | 91.9 (90.1-94.3)      | 93.9 (90.1-97.3)      | 93.2 (91.1-94.7)   |
| <b>External-testing dataset</b> |               |            |           |                  |                       |                       |                    |
| <b>ODD vs. PE</b>               | 421           | 207        | 214       | 0.97 (0.96-0.98) | 86.0 (82.1-90.1)      | 94.9 (92.3-97.6)      | 90.5 (88.0-92.9)   |

Abbreviations: AUC = area under the receiver-operating-characteristic curve; CI = confidence interval; ODD = optic disc drusen; PE = papilledema.

**Table 5** Classification Performance of the Deep-Learning System in Discriminating Different Subgroups of Optic Disc Drusen and Papilledema in the External-Testing Data Set

|                               | <b>Total</b>  | <b>ODD</b> | <b>PE</b> | <b>AUC</b>       | <b>Sensitivity, %</b> | <b>Specificity, %</b> | <b>Accuracy, %</b> |
|-------------------------------|---------------|------------|-----------|------------------|-----------------------|-----------------------|--------------------|
|                               | No. of images |            |           |                  |                       |                       |                    |
| <b>Visible ODD vs. SP</b>     | 218           | 96         | 122       | 0.99 (0.98-1.00) | 94.8 (91.7-98.4)      | 97.5 (95.7-100.0)     | 96.3 (94.4-98.6)   |
| <b>Visible ODD vs. all PE</b> | 310           | 96         | 214       | 0.98 (0.97-0.99) | 94.8 (91.5-98.4)      | 94.9 (92.4-97.7)      | 94.8 (92.8-97.0)   |
| <b>Visible ODD vs. MP</b>     | 188           | 96         | 92        | 0.96 (0.94-0.98) | 94.8 (91.8-98.4)      | 91.3 (86.5-96.4)      | 93.1 (90.2-96.1)   |
| <b>Buried ODD vs. SP</b>      | 233           | 111        | 122       | 0.99 (0.98-1.00) | 78.4 (72.1-84.9)      | 97.5 (95.6-100.0)     | 88.4 (85.0-92.1)   |
| <b>Buried ODD vs. all PE</b>  | 325           | 111        | 214       | 0.96 (0.95-0.98) | 78.4 (72.2-85.0)      | 94.9 (92.3-97.7)      | 89.2 (86.4-92.2)   |
| <b>Buried ODD vs. MP</b>      | 203           | 111        | 92        | 0.93 (0.90-0.96) | 78.4 (72.2-84.7)      | 91.3 (87.0-96.4)      | 84.2 (80.2-88.6)   |

Abbreviations: AUC = area under the receiver-operating-characteristic curve; CI = confidence interval; MP = mild-to-moderate papilledema; ODD = optic disc drusen; PE = papilledema; SP = severe papilledema.
