# Supplementary material for: A Deep Learning Approach to Accurately Discriminate Between Optic Disc Drusen and Papilledema on Fundus Photographs
Source: bioRxiv or medRxiv preprint supplement (doi:10.1101/2023.05.24.23290447), 2023-05-29
Supplement: Supplementary file [file media-2.pdf]

**Table S1** Cameras Used at Participating Centers

| <b>City, country</b>                   | <b>Camera brand</b> | <b>Model</b>                                       |
|----------------------------------------|---------------------|----------------------------------------------------|
| Angers, France                         | Topcon              | TRC-NW6S                                           |
| Atlanta, GA, United States             | Topcon              | TRC-50DX                                           |
| Baltimore, MD, United States           | Carl Zeiss          | FF4                                                |
| Bangkok, Thailand                      | Kowa                | WX3D                                               |
| Bologna, Italy                         | Carl Zeiss/Topcon   | VISUCAM 500/DRI OCT Triton                         |
| Bordeaux, France                       | Carl Zeiss          | VISUCAM 500                                        |
| Chennai, India                         | Carl Zeiss          | FF450 Plus IR                                      |
| Calgary, Alberta, Canada               | Carl Zeiss          | VISUCAM 224/524                                    |
| Coimbra, Portugal                      | Topcon              | TRC-NW7SF Mark II                                  |
| Copenhagen, Denmark                    | Topcon              | TRC-50DX and TRC-NW8                               |
| Freiburg, Germany                      | Carl Zeiss          | SF420                                              |
| Geneva, Switzerland                    | Carl Zeiss          | FF450 Plus                                         |
| Grenoble, France                       | Topcon/Canon        | TRC-NW6S/CR2                                       |
| Guangzhou, China                       | Topcon/Carl Zeiss   | TRC-50DX/FF450 Plus IR                             |
| Hongkong, China                        | Topcon              | TRC-50DX                                           |
| Kinshasa, Democratic Republic of Congo | Carl Zeiss          | VISUCAM 500                                        |
| London, Ontario, Canada                | Topcon              | TRC-50DX                                           |
| London, United Kingdom                 | Topcon/Canon        | TRC-50DX/CR2                                       |
| Manila, Philippines                    | Carl Zeiss/ Meditec | VISUCAM 500/VISUCAM NMFA                           |
| Paris, France                          | Canon               | CRDGI                                              |
| Rochester, MN, United States           | Topcon              | TRC-50DX                                           |
| Seoul, Korea                           | Kowa                | VX-10a                                             |
| Singapore, Singapore                   | Topcon/ Canon/ Kowa | TRC-50DX/ DRI OCT Triton Plus/ CR-Dgi/ Nonmyd-WX3D |
| Sydney, Australia                      | Carl Zeiss          | VISUCAM 500                                        |
| Syracuse, NY, United States            | Topcon/Carl Zeiss   | TRC-NW8 and TRC-NW400/FF 450                       |
| Tehran, Iran                           | Canon               | CR2                                                |
| Toronto, Ontario, Canada               | Carl Zeiss          | VISUCAM 500                                        |
| Ufa, Russia                            | Carl Zeiss          | VISUCAM 500                                        |
