# Supplementary material for: A Deep Learning Approach to Accurately Discriminate Between Optic Disc Drusen and Papilledema on Fundus Photographs
Source: bioRxiv or medRxiv preprint supplement (doi:10.1101/2023.05.24.23290447), 2023-05-29
Supplement: Supplementary file [file media-3.pdf]

## Collaborators of the BONSAI group for this study and their Affiliations (alphabetical order by city)

| Name                                  | Centre                                                                                                                                                                                                               |
|---------------------------------------|----------------------------------------------------------------------------------------------------------------------------------------------------------------------------------------------------------------------|
| Axel <u>Petzold</u>                   | Neuro-ophthalmology Expert Centre, Amsterdam University Medical Center, Amsterdam, Netherlands                                                                                                                       |
| <u>Maillette de Buy Wenniger</u> L.J. | Neuro-ophthalmology Expert Centre, Amsterdam University Medical Center, Amsterdam, Netherlands                                                                                                                       |
| Philippe <u>Gohier</u>                | University Hospital Angers, Angers, France                                                                                                                                                                           |
| Neil R <u>Miller</u>                  | Johns Hopkins University School of Medicine, Baltimore, MD, USA<br>Division of Neuro-Ophthalmology, Wilmer Eye Institute, Johns Hopkins University, Baltimore, MD, USA                                               |
| Kavin <u>Vanikieti</u>                | Faculty of Medicine Ramathibodi Hospital, Mahidol University, Bangkok, Thailand                                                                                                                                      |
| Yanin <u>Suwan</u>                    | Faculty of Medicine Ramathibodi Hospital, Mahidol University, Bangkok, Thailand                                                                                                                                      |
| Giulia <u>Amore</u>                   | Dipartimento di Scienze Biomediche e Neuromotorie, Università degli Studi di Bologna, Bologna, Italy                                                                                                                 |
| Valerio <u>Carelli</u>                | IRCCS Istituto delle Scienze Neurologiche di Bologna, UOC Clinica Neurologica, Dipartimento di Scienze Biomediche e Neuromotorie, Università degli Studi di Bologna, Bologna, Italy                                  |
| Chiara <u>La Morgia</u>               | IRCCS Istituto delle Scienze Neurologiche di Bologna, UOC Clinica Neurologica, Dipartimento di Scienze Biomediche e Neuromotorie, Università degli Studi di Bologna, Bologna, Italy                                  |
| Marie-Bénédicte <u>Rougier</u>        | Department of Ophthalmology, University Hospital of Bordeaux, Bordeaux, France                                                                                                                                       |
| Étienne <u>Bénard-Séguin</u>          | Queens University School of Medicine, Kingston, Ontario, Canada                                                                                                                                                      |
| Leonard B. <u>Milea</u>               | University of California, Berkeley, Berkeley, California, USA                                                                                                                                                        |
| Selvakumar <u>Ambika</u>              | Neuro-ophthalmology. Sankara Nethralaya-A unit of Medical Research Foundation, Chennai, India                                                                                                                        |
| Pedro L. <u>Fonseca</u>               | Ophthalmology, Centro Hospitalar e Universitário de Coimbra (CHUC), Coimbra Institute for Biomedical Imaging and Translational Research (CIBIT), Faculty of Medicine University of Coimbra (FMUC), Coimbra, Portugal |
| Elisabeth Arnberg <u>Wibroe</u>       | Department of Ophthalmology, Rigshospitalet, University of Copenhagen, Glostrup, Denmark                                                                                                                             |
| Nicolae <u>Sanda</u>                  | Department of Clinical Neurosciences, Geneva University School of Medicine, Geneva, Switzerland                                                                                                                      |
| Gabriele <u>Thumann</u>               | Department of Clinical Neurosciences, Geneva University School of Medicine, Geneva, Switzerland                                                                                                                      |
| Christophe <u>Chiquet</u>             | Department of Ophthalmology, University Hospital of Grenoble-Alpes, Grenoble-Alpes University, HP2 Laboratory, INSERM U1042, Grenoble, France                                                                        |
| Hui <u>Yang</u>                       | Zhongshan Ophthalmic Center, Sun Yat-sen University, Guangzhou, P.R.China                                                                                                                                            |
| Carmen K.M. <u>Chan</u>               | Ophthalmology and Visual Sciences, Hong Kong Eye Hospital, The Chinese University of Hong Kong, Hong Kong Special Administrative Region, China                                                                       |

|                                  |                                                                                                                                                                                                                                                                                                                                                                                      |
|----------------------------------|--------------------------------------------------------------------------------------------------------------------------------------------------------------------------------------------------------------------------------------------------------------------------------------------------------------------------------------------------------------------------------------|
| Carol Y. <u>Cheung</u>           | Ophthalmology and Visual Sciences, Hong Kong Eye Hospital, The Chinese University of Hong Kong, Hong Kong Special Administrative Region, China                                                                                                                                                                                                                                       |
| Janvier Ngoy <u>Kilangalanga</u> | Eye Department, Saint Joseph Hospital/Centre de Formation Ophtalmologique Pour l'Afrique Centrale, Kinshasa, Democratic Republic of the Congo                                                                                                                                                                                                                                        |
| Makoto <u>Nakamura</u>           | Division of Ophthalmology, Department of Surgery, Kobe University Graduate School of Medicine, Kobe, Japan                                                                                                                                                                                                                                                                           |
| Fumio <u>Takano</u>              | Division of Ophthalmology, Department of Surgery, Kobe University Graduate School of Medicine, Kobe, Japan                                                                                                                                                                                                                                                                           |
| Neringa <u>Jurkute</u>           | Moorfields Eye Hospital NHS Foundation Trust, London, UK<br>UCL Institute of Ophthalmology, University College London, London, UK                                                                                                                                                                                                                                                    |
| Patrick <u>Yu-Wai-Man</u>        | Moorfields Eye Hospital NHS Foundation Trust, London, UK<br>UCL Institute of Ophthalmology, University College London, London, UK<br>Cambridge Eye Unit, Addenbrooke's Hospital, Cambridge University Hospitals, Cambridge, UK<br>Cambridge Centre for Brain Repair and MRC Mitochondrial Biology Unit, Department of Clinical Neurosciences, University of Cambridge, Cambridge, UK |
| Richard <u>Kho</u>               | American Eye Center, Mandaluyong City, Manila, Philippines                                                                                                                                                                                                                                                                                                                           |
| John J. <u>Chen</u>              | Department of Ophthalmology and Neurology, Mayo Clinic, Rochester, MN, USA                                                                                                                                                                                                                                                                                                           |
| Jeong-Min <u>Hwang</u>           | Ophthalmology Department, Seoul National University College of Medicine, Seoul National University Bundang Hospital, Republic of Korea                                                                                                                                                                                                                                               |
| Dong Hyun <u>Kim</u>             | Ophthalmology Department, Seoul National University College of Medicine, Seoul National University Bundang Hospital, Republic of Korea                                                                                                                                                                                                                                               |
| Hee Kyung <u>Yang</u>            | Ophthalmology Department, Seoul National University College of Medicine, Seoul National University Bundang Hospital, Republic of Korea                                                                                                                                                                                                                                               |
| Jing Liang <u>Loo</u>            | Neuro-Ophthalmology Department, Singapore National Eye Centre, Singapore                                                                                                                                                                                                                                                                                                             |
| Reuben Chao Ming <u>Foo</u>      | Neuro-Ophthalmology Department, Singapore National Eye Centre, Singapore                                                                                                                                                                                                                                                                                                             |
| Shweta <u>Singhal</u>            | Neuro-Ophthalmology Department, Singapore National Eye Centre, Singapore                                                                                                                                                                                                                                                                                                             |
| Sharon Lee Choon <u>Tow</u>      | Neuro-Ophthalmology Department, Singapore National Eye Centre, Singapore                                                                                                                                                                                                                                                                                                             |
| Caroline <u>Vasseneix</u>        | Visual Neuroscience Research Group, Singapore Eye Research Institute, Singapore National Eye Center, Singapore                                                                                                                                                                                                                                                                       |
| Maxwell T. <u>Finkelstein</u>    | Visual Neuroscience Research Group, Singapore Eye Research Institute, Singapore National Eye Center, Singapore                                                                                                                                                                                                                                                                       |
| Luis J. <u>Mejico</u>            | Departments of Neurology, Ophthalmology, SUNY Upstate Medical University, Syracuse, NY, USA                                                                                                                                                                                                                                                                                          |
| Masoud <u>Aghsaei Fard</u>       | Farabi Eye Hospital, Tehran University of Medical Science, Tehran, Iran                                                                                                                                                                                                                                                                                                              |
| Jonathan A. <u>Micieli</u>       | Faculty of Medicine, University of Toronto, Toronto, Ontario, Canada<br>Department of Ophthalmology and Vision Sciences, University of Toronto, Toronto, Ontario, Canada<br>Kensington Vision and Research Centre, Toronto, Ontario, Canada<br>Department of Ophthalmology, St. Michael's Hospital and Toronto Western Hospital, Toronto, Ontario, Canada                            |

Mukharram M. Bikbov

Ufa Eye Research Institute, Ufa, Russia
